# Supplementary material
Source: MDPI journal article supplement (https://www.mdpi.com/2073-4441/14/17/2734)
Supplement: s1 [file s1]

Supporting information

# **Development of Vitamin B6-Mediated Biochar with Nano Zero-Valent Iron Coating for Oxytetracycline Removal through Adsorption and Degradation under Harsh Acidic Conditions**

*Yuelin Xin<sup>1</sup>, Peng Zhang<sup>2,\*</sup>, Jian Shen<sup>2</sup>, Shaojie Ren<sup>1</sup>*

*<sup>1</sup> School of Environmental Science and Engineering, Shandong University, Qingdao 266237,  
China*

*<sup>2</sup> Institute for Energy, Environment and Sustainable Communities, University of  
Regina, Regina, SK S4S 0A2, Canada*

## Contents

1. Adsorption isotherm models
2. Kinetic models
3. The removal rate in cycles OTC exposure experiment by nZVI @BC and nZVI/B6@BC.
4. Dissolution of iron of nZVI/B6@BC and nZVI@BC
5. HPLC method
6. Zeta potential of different composites in aqueous water.
7. The isotherm parameters of oxytetracycline adsorption
8. The kinetic parameters of oxytetracycline adsorption
9. The kinetic parameters of oxytetracycline removal
10. The results of HPLC-MS

## References

## 1. Adsorption isotherm models

Four adsorption isotherm models were simulated to study the adsorption characteristics of modified biochar for OTC<sup>1</sup>. The equations are as follows:

Langmuir:

$$Q_e = \frac{Q_m K_L C_e}{1 + K_L C_e} \quad (1)$$

where  $C_e$  (mg/L) is the initial and equilibrium concentrations,  $Q_m$  (mg/g) is the theoretical maximum adsorption capacity, and  $K_L$  (L/mg) is the Langmuir equilibrium constant related to the surface heterogeneity representing the adsorption strength.

Freundlich:

$$Q_e = K_f C_e^{\frac{1}{n}} \quad (2)$$

where  $K_f$  (mg/g·(L/mg)<sup>1/n</sup>) is the Freundlich adsorption capacity, and  $n$  is the Freundlich constant related to the surface heterogeneity representing the adsorption strength.

Temkin:

$$Q_e = A \ln(K_T) + A \ln(C_e) \quad (3)$$

where  $K_T$  (L/mg) is the equilibrium binding constant, and  $A$  (J/mol) is the Temkin adsorption heat-related coefficient.

## 2. Kinetic models

Three kinetic models were simulated to study the adsorption and removal characteristics of modified biochar for OTC<sup>2</sup>. The equations are as follows:

1) The pseudo-first-order:

$$Q_t = Q_e(1 - \exp(-K_1 t)) \quad (4)$$

The linear pseudo-first-order:

$$\ln(Q_e - Q_t) = \ln Q_e - K_1 t \quad (5)$$

where  $K_1$  ( $\text{min}^{-1}$ ) is the pseudo-first order adsorption rate constant,  $Q_e$  (mg/L) is the initial and equilibrium concentrations,  $Q_t$  (mg/g) is the adsorption capacity at different time..

2) The pseudo-second-order:

$$Q_e = \frac{Q_e^2 K_2 t}{1 + Q_e K_2 t} \quad (6)$$

Linear pseudo-second-order:

$$\frac{t}{Q_t} = \frac{1}{Q_e} t + \frac{1}{Q_e^2 K_2} \quad (7)$$

where  $Q_e$  (mg/L) is the initial and equilibrium concentrations,  $Q_t$  (mg/g) is the adsorption capacity at different time  $K_2$  ( $\text{g}/(\text{mg} \cdot \text{min})$ ) is the pseudo-second-order adsorption rate constant.

3) Intra-particle diffusion:

$$Q_t = K_{int} t^{\frac{1}{2}} + C \quad (8)$$

where  $K_{int}$  ( $\text{mg}/(\text{g} \cdot \text{min}^{1/2})$ ) is the intraparticle diffusion rate constant,  $Q_t$  (mg/g) represents the amounts of OTC adsorbed or removed at time  $t$  (min),  $C$  is a constant related to the boundary layer thickness and decreases with increasing surface heterogeneity and the number of hydrophilic groups for biochar.

The fitting analysis of kinetics and isotherm modelling and illustrations were carried out with Origin 2021 software.

3. The removal rate in four cycle OTC exposure experiment by nZVI@BC and nZVI/B6@BC.

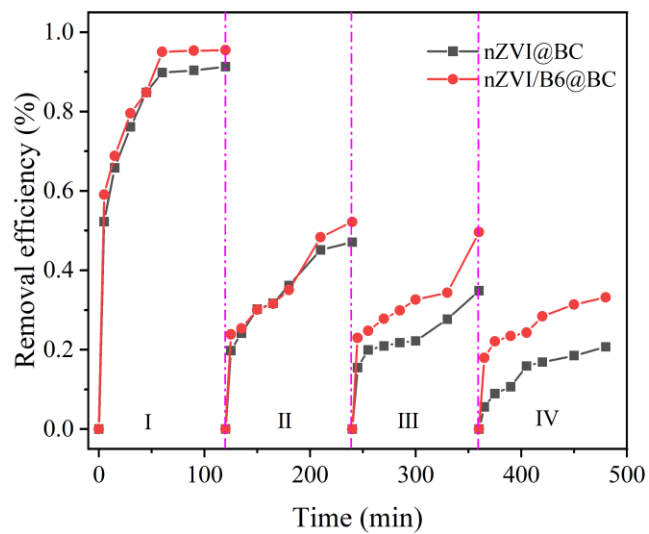

Figure S1 The removal rate in four cycles OTC exposure experiment by nZVI @BC and nZVI/B6@BC.

#### 4. Dissolution of iron of nZVI/B6@BC and nZVI@BC

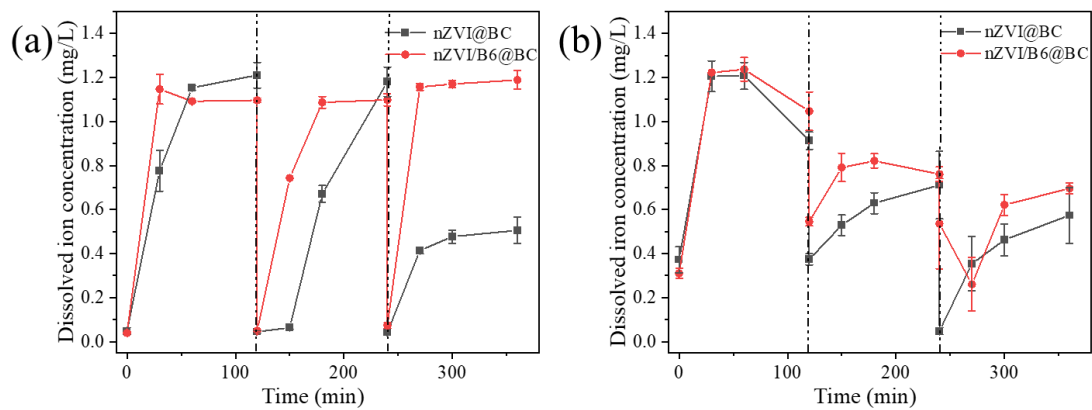

Figure S2: Dissolution of iron of nZVI/B6@BC and nZVI@BC in acid conditions (pH = 3.5) exposure cycles under a) pure deionized water adjusted by acid hydrochloric acid and b) 500 mg/L OTC solutions.

## 5. HPLC method

The Thermo Ultimate 3000 HPLC-system (Thermo Fisher Scientific, Waltham, USA) was used for OTC detection, equipped with an autosampler (operated at 4 °C), a pump, and a thermos-stated column oven. The analytical column was an Agela Venusil MP C18 chromatographic column (4.6 mm × 150 mm, 5 µm, Agela, China) operated at 35 °C. UV detector operated at 355 nm. The mobile phases consisted of 0.01 mol/L aqueous NaH<sub>2</sub>PO<sub>4</sub> (pH = 2.5, B) and acetonitrile (A) and the flow rate was 1.0 mL/min. Gradient elution adjusted by time: 0-1 min, 90% B, 1-4 min: 90-80% B, 4-10 min: 80% B, 10-12 min: 80-90% B. The OTC peaks approximately appeared at 7.8 min.

6. Zeta potential of different composites in aqueous water.

**Table S1** Zeta potential of different composites in aqueous water.

| Composite type | Zeta potential<br>(mV) | Conductivity<br>(mS/cm) |
|----------------|------------------------|-------------------------|
| BC             | -23                    | 0.1005                  |
| B6@BC          | -17.3                  | 0.00429                 |
| nZVI@BC        | 10.2                   | 0.0337                  |
| nZVI/B6@BC     | 11.37                  | 0.0201                  |



## 7. The isotherm parameters of oxytetracycline adsorption

**Table S2** The isotherm parameters of oxytetracycline adsorption onto BC and B6@BC at 25 °C and pH = 3.5.

| Isotherm model |                               | Parameters of BC |        |                               | Parameters of B6@BC |        |  |
|----------------|-------------------------------|------------------|--------|-------------------------------|---------------------|--------|--|
| Langmuir       | $Q_m$ (mg/g)                  | $K_L$ (L/mg)     | $R^2$  | $Q_m$ (mg/g)                  | $K_L$ (L/mg)        | $R^2$  |  |
|                | 47.898                        | 0.0068           | 0.9420 | 52.7869                       | 0.0349              | 0.9973 |  |
| Freundlich     | $K_f$                         | $n$              | $R^2$  | $K_f$                         | $n$                 | $R^2$  |  |
|                | (mg/g·(L/mg) <sup>1/n</sup> ) |                  |        | (mg/g·(L/mg) <sup>1/n</sup> ) |                     |        |  |
|                | 11.945                        | 2.235            | 0.9693 | 2.465                         | 4.448               | 0.9473 |  |
| Temkin         | $K_T$ (L/mg)                  | $B$ (J/mol)      | $R^2$  | $K_T$ (L/mg)                  | $B$ (J/mol)         | $R^2$  |  |
|                | 0.6747                        | 11.158           | 0.9699 | 0.02205                       | 8.3187              | 0.9551 |  |

## 8. The kinetic parameters of oxytetracycline adsorption

**Table S3** The kinetic parameters of oxytetracycline adsorption onto BC and B6@BC at 25 °C and pH = 3.5.

| Kinetic model            |                                            | parameters   |        |
|--------------------------|--------------------------------------------|--------------|--------|
| Pseudo-first order       | $K_1$ (min <sup>-1</sup> )                 | $Q_e$ (mg/g) | $R^2$  |
| BC                       | 0.0249                                     | 67.38        | 0.9545 |
| B6@BC                    | 0.0205                                     | 51.21        | 0.9808 |
| Pseudo-second order      | $K_2$ (g/(mg·min))                         | $Q_e$ (mg/g) | $R^2$  |
| BC                       | 0.0006                                     | 89.28        | 0.9865 |
| B6@BC                    | 0.0104                                     | 90.09        | 0.9928 |
| Intramolecular diffusion | $K_{int}$<br>(mg/(mg·min <sup>1/2</sup> )) | $C$ (mg/g)   | $R^2$  |
| BC                       | 6.0202                                     | 17.182       | 0.9885 |
| B6@BC                    | 4.8496                                     | 34.166       | 0.987  |

## 9. The kinetic parameters of oxytetracycline removal

**Table S4** The kinetic parameters of oxytetracycline removal onto nZVI@BC and nZVI/B6@BC at 25 °C and pH = 3.5.

| Kinetic model       |                            | parameters   |         |
|---------------------|----------------------------|--------------|---------|
| Pseudo-first order  | $K_1$ (min <sup>-1</sup> ) | $C_e$ (mg/L) | $R^2$   |
| nZVI@BC             | 0.00504                    | 117.91       | 0.8149  |
| nZVI/B6@BC          | 0.00458                    | 80.479       | 0.5430  |
| Pseudo-second order | $K_2$ (g/(mg·min))         | $C_e$ (mg/L) | $R^2$   |
| nZVI@BC             | 0.000275                   | 490.196      | 0.99986 |
| nZVI/B6@BC          | 0.000403                   | 490.196      | 0.99992 |

10. The results of HPLC-MS

(1) OTC blank

RT: 0.00 - 10.00

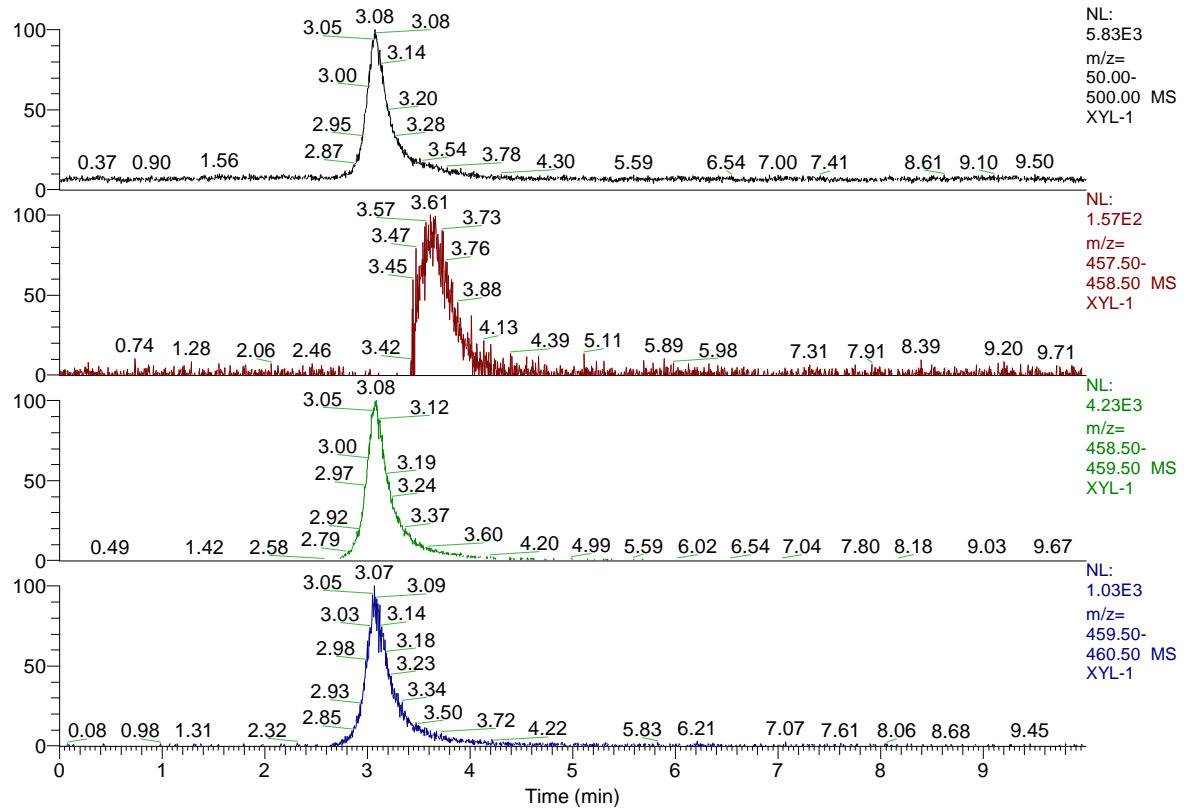

## (2) The HPLC-MS of BC after 120 min

RT: 0.00 - 10.00

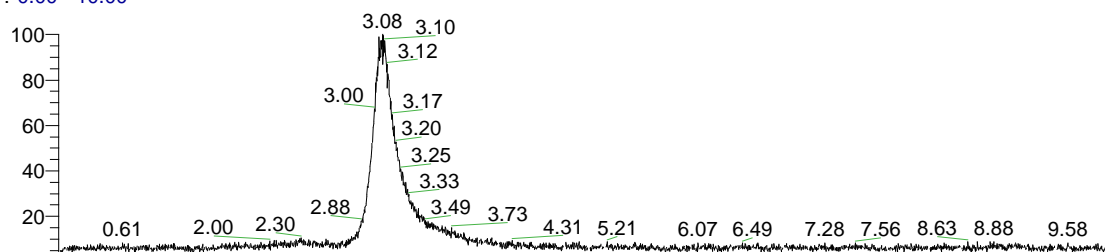

NL:  
6.30E3  
TIC MS  
XYL-2

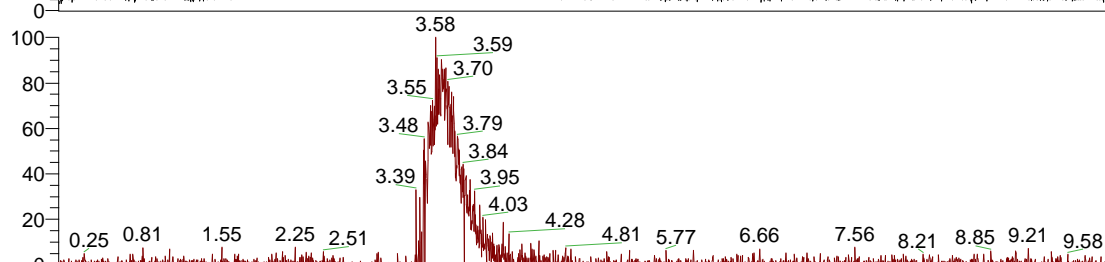

NL:  
2.06E2  
m/z=  
457.50-  
458.50 MS  
XYL-2

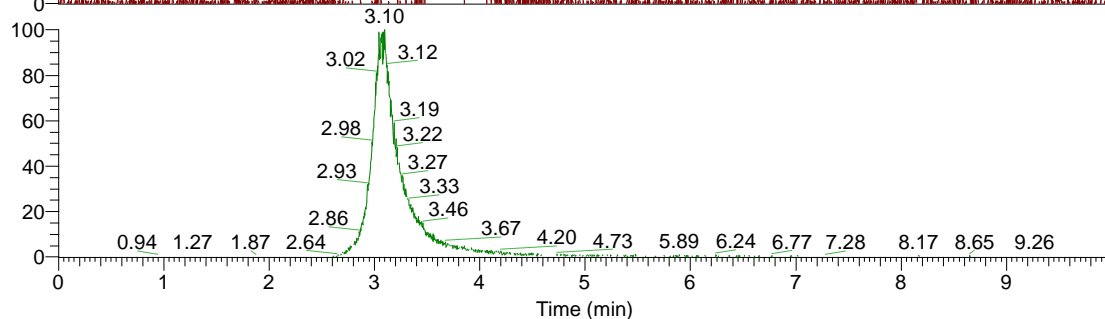

NL:  
4.70E3  
m/z=  
458.50-  
459.50 MS  
XYL-2

(3) The HPLC-MS of B6@BC after 120 min.

RT: 0.00 - 10.00

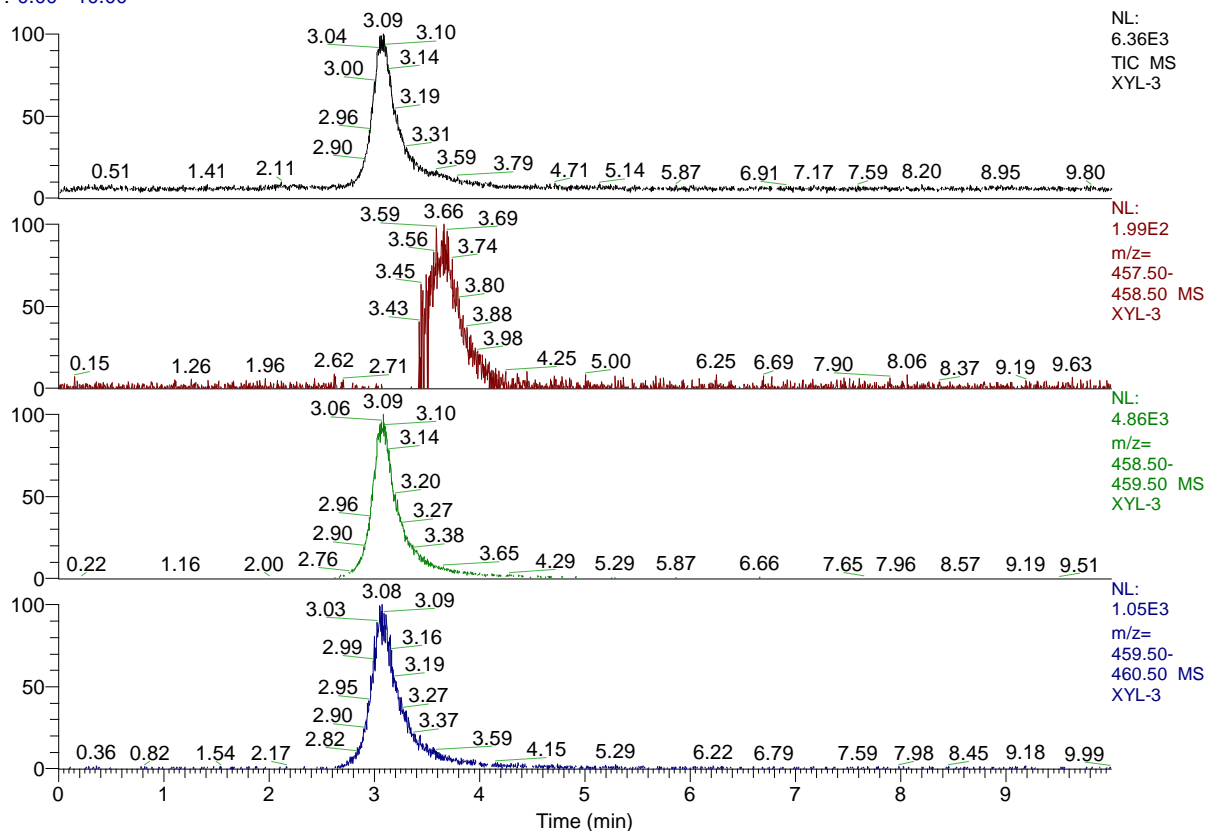

(4) The HPLC-MS of nZVI@BC after 5 min

RT: 0.00 - 10.00

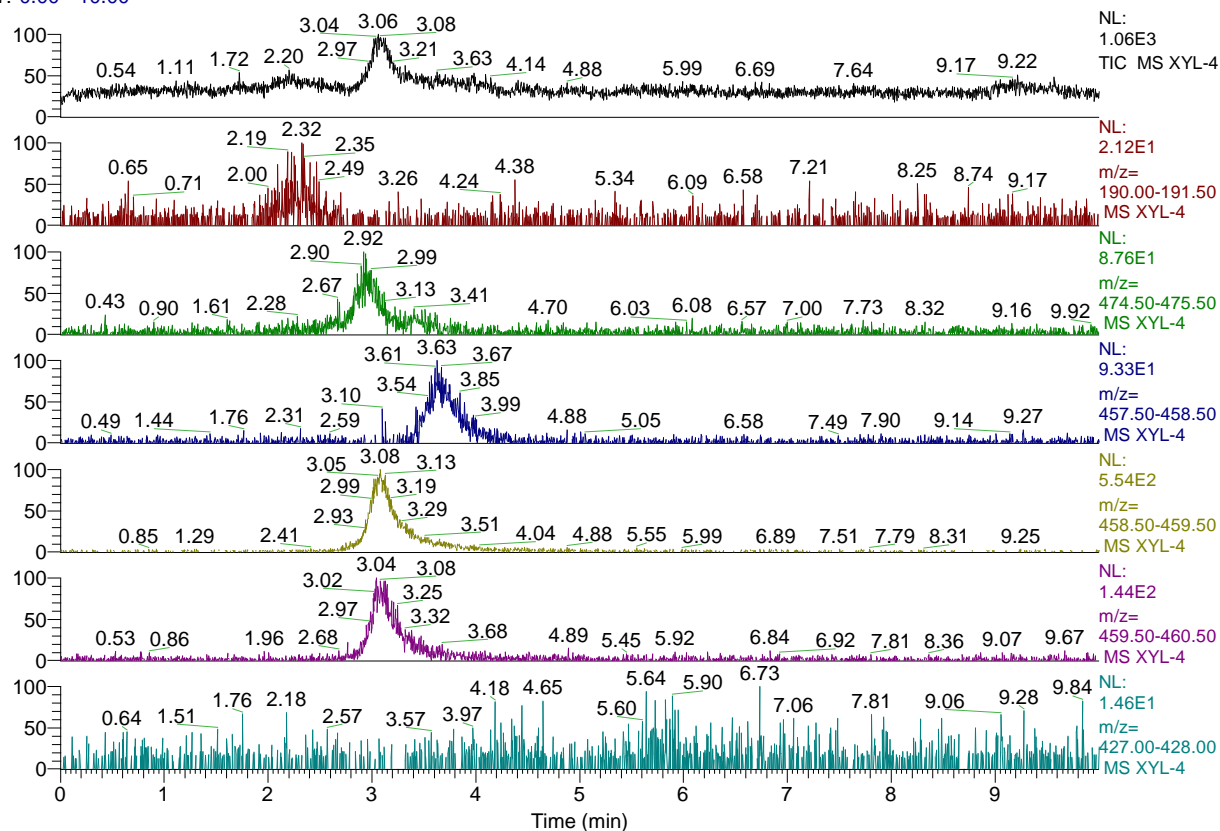

(5) The HPLC-MS of nZVI/B6@BC after 5 min

RT: 0.00 - 10.00

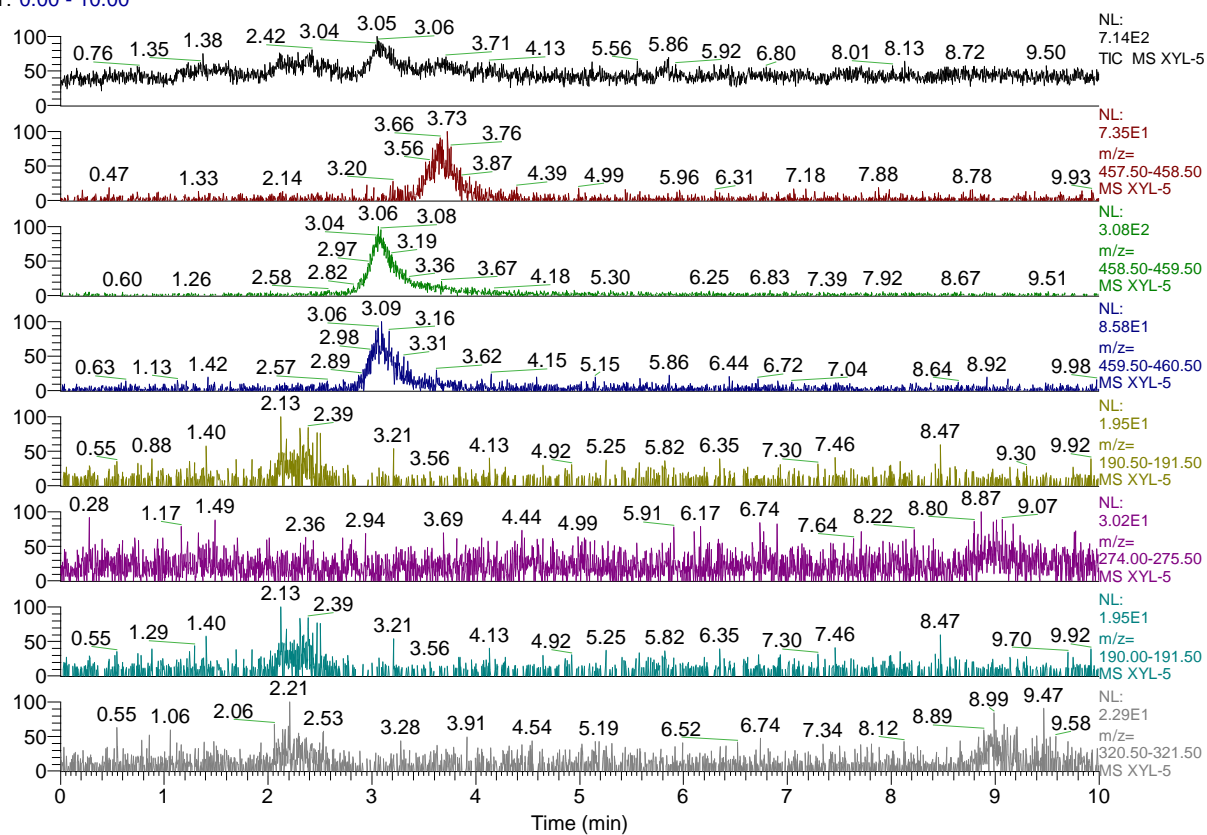



(6) The HPLC-MS of nZVI @BC after 120 min.

RT: 0.00 - 10.00

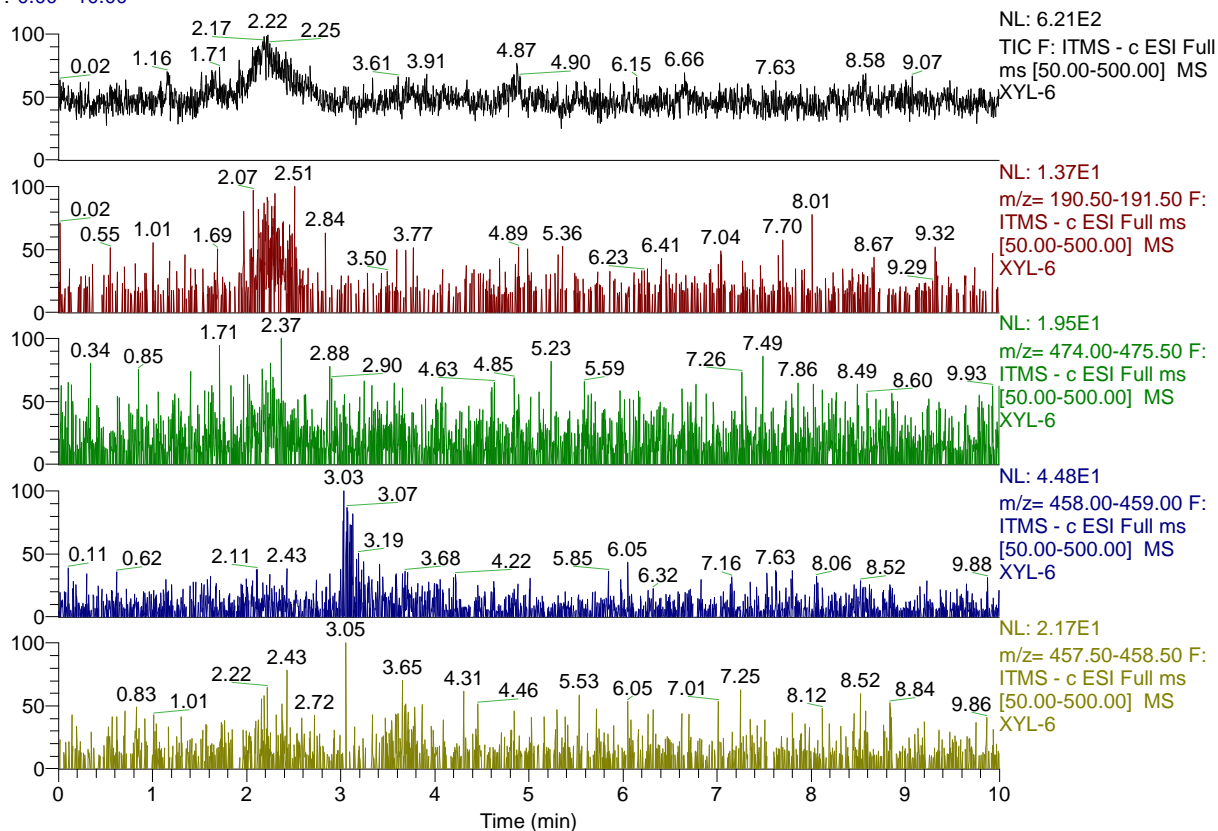

(7) The HPLC-MS of nZVI/B6@BC after 120 min.

RT: 0.00 - 10.00

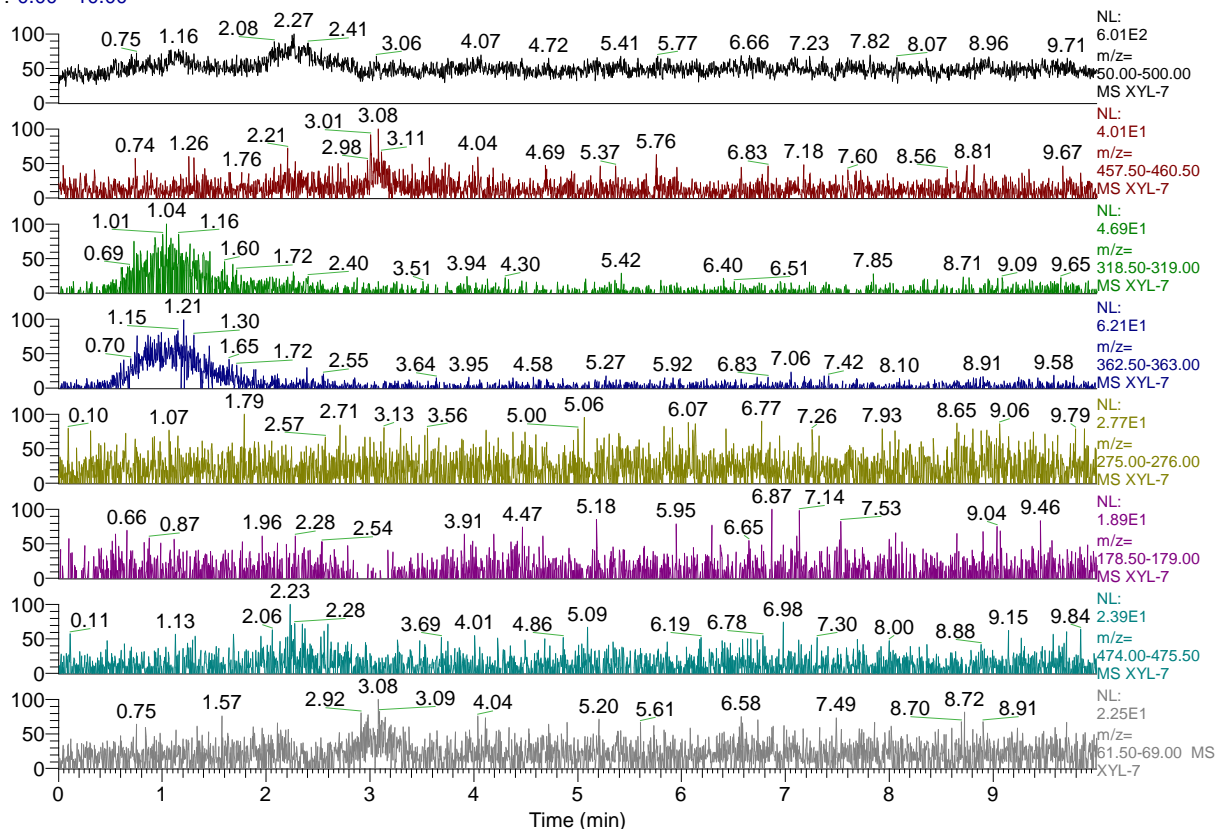

RT: 0.00 - 10.00

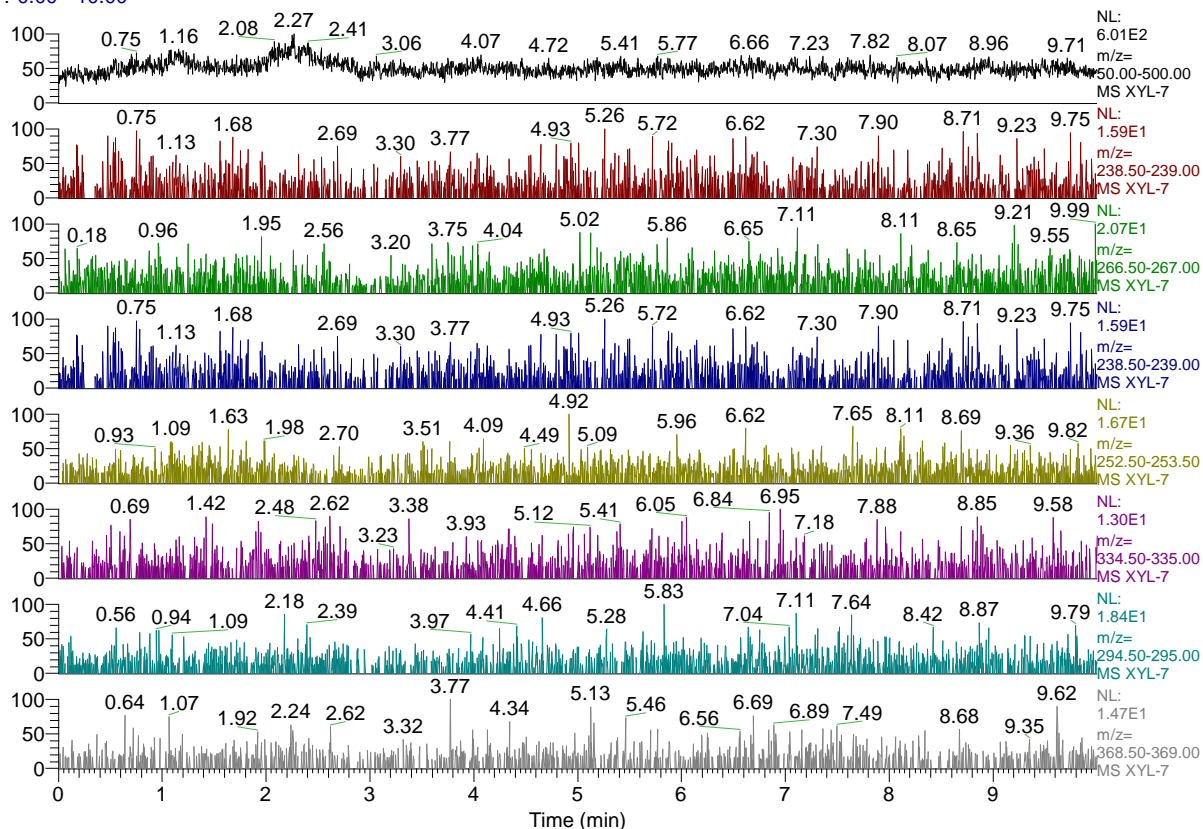

Figure S3 The HPLC-MS of (1)OTC blank, (2)BC, (3)B6@BC after 120 min, (4) nZVI @BC, (5) nZVI/B6@BC after 5 min, (6) nZVI @BC, and (7)nZVI/B6@BC after 120 min.

## References

1. Saremi, F.; Miroliaei, M. R.; Shahabi Nejad, M.; Sheibani, H., Adsorption of tetracycline antibiotic from aqueous solutions onto vitamin B6-upgraded biochar derived from date palm leaves. *Journal of Molecular Liquids* **2020**, 318.
2. Zhang, H.; Wang, J.; Zhou, B.; Zhou, Y.; Dai, Z.; Zhou, Q.; Christie, P.; Luo, Y., Enhanced adsorption of oxytetracycline to weathered microplastic polystyrene: Kinetics, isotherms and influencing factors. *Environ Pollut* **2018**, 243, (Pt B), 1550-1557.
